# Supplementary material for: Combining amphiphilic chitosan and bioglass for mediating cellular osteogenic growth peptide gene
Source: Royal Society of Chemistry journal article supplement (doi:10.1039/c5ra13628h), 2015-01-01
Supplement: c5ra13628h1.pdf [file c5ra13628h1.pdf]

1

## Supplementary materials

2 **Combining amphiphilic chitosan and bioglass for mediating osteogenic growth**

3

### peptide gene in two cell lines

4 Jie Luo<sup>ab</sup>, You Ling<sup>ab</sup>, Xian Li<sup>ac</sup>, Bo Yuan,<sup>c</sup> Feng Yu<sup>ab</sup> and Xiaofeng Chen<sup>\*abc</sup>

5 <sup>a</sup>School of Materials Science and Engineering, South China University of Technology,

6 Guangzhou, 510641, China

7 <sup>b</sup>National Engineering Research Center for Tissue Restoration and Reconstruction, South

8 China University of Technology, Guangzhou, 510006, China

9 <sup>c</sup>Key Laboratory of Biomedical Materials and Engineering, Ministry of Education, Guangzhou,

10 510006, China

11

12 \* To whom correspondence should be addressed.

13 Xiaofeng Chen

14 Email: [chenxf@scut.edu.cn](mailto:chenxf@scut.edu.cn)

15 Fax: +86-20-22236083

16 Tel:+86-20-22236283

1 Table S1 Characterization of mPEG-PCL copolymer.

| mPEG-PCL<br>(Theoretical) | Mn<br>(Theoretical) | Mn<br>(GPC) | Mw<br>(GPC) | PDI<br>(GPC) |
|---------------------------|---------------------|-------------|-------------|--------------|
| 2000-2000                 | 4000                | 3791        | 4399        | 1.16         |

2

3

4 Table S2 Degree of substitution (DS) and CMC of CS-PCL-mPEG nanoparticles.

| sample      | CSPH : mPEG-PCL (g/g) | DS (mPEG-PCL) | CMC ( $\mu\text{g/mL}$ ) |
|-------------|-----------------------|---------------|--------------------------|
| CS-PCL-mPEG | 1 : 1                 | 8.46          | 31                       |

5

6

7

8

9

10

11

12

13

14

15

16

17 Fig. S1 Construction of recombinant plasmid pOGP.

18

19

20

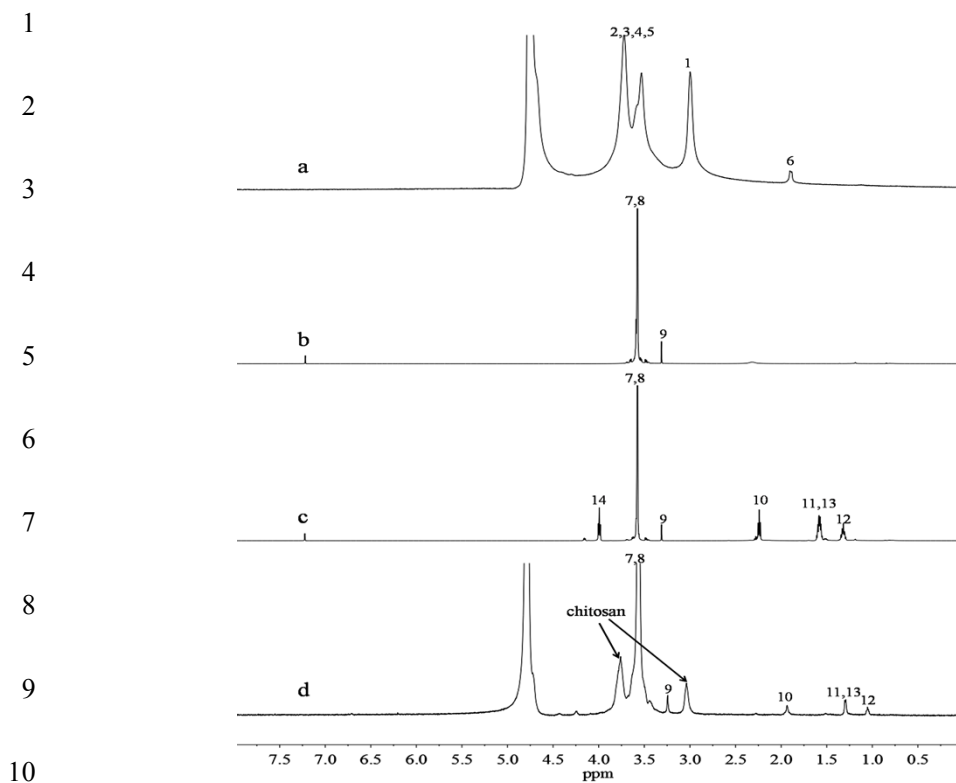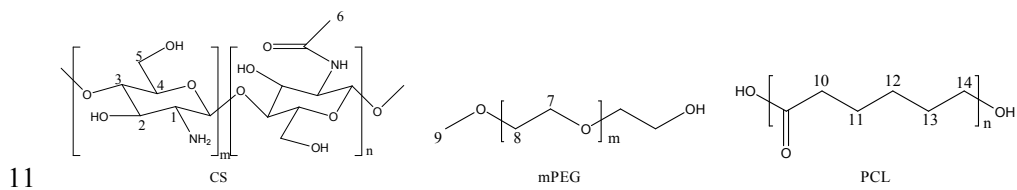

Fig. S2  $^1\text{H}$  NMR spectra of chitosan in Trifluoroacetic acid and  $\text{D}_2\text{O}$  (a), mPEG in  $\text{CDCl}_3$  (b), mPEG-PCL in  $\text{CDCl}_3$  (c), CS-PCL-mPEG in Trifluoroacetic acid and  $\text{D}_2\text{O}$  (d).

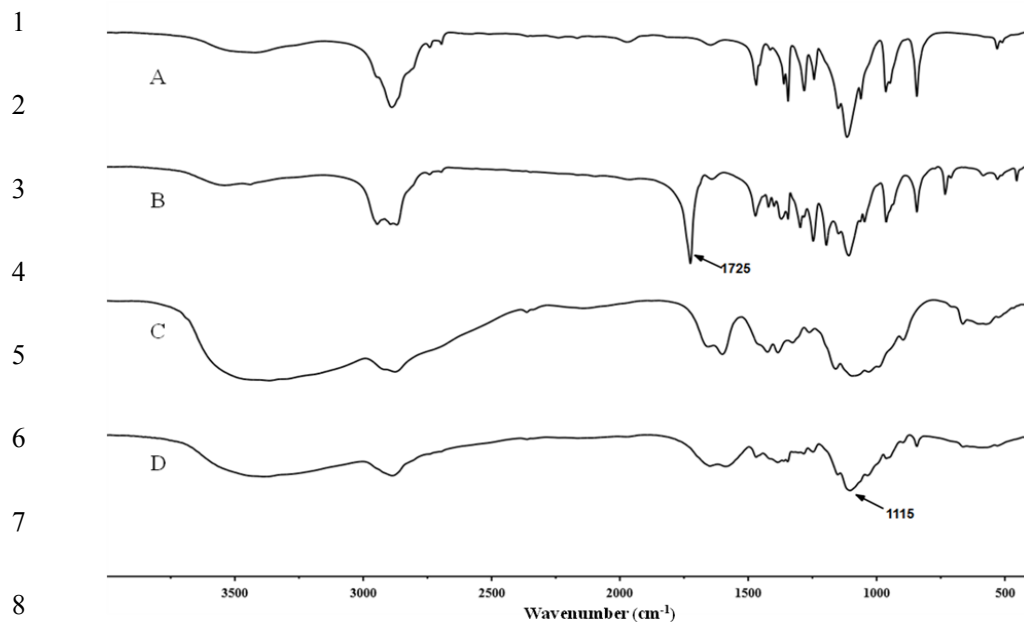

9 Fig. S3 FT-IR spectra of mPEG (A), mPEG-PCL (B), CS (C), CS-PCL-mPEG (D).
